# Supplementary material for: A Major Downregulation of Circulating microRNAs in Zika Acutely Infected Patients: Potential Implications in Innate and Adaptive Immune Response Signaling Pathways
Source: Front Genet. 2022 Jun 1;13:857728. doi: 10.3389/fgene.2022.857728 (PMC9199004; doi:10.3389/fgene.2022.857728)
Supplement: Supplementary file 3 [file Table3.XLS]

## Sheet: Sheet0
Symbol	Entrez Gene Name	Location	Type(s)	Biomarker Application(s)	Drug(s)	Entrez Gene ID for Human	Entrez Gene ID for Mouse	Entrez Gene ID for Rat
ABCD4	ATP binding cassette subfamily D member 4	Cytoplasm	transporter			5826	19300	299196
ABHD10	abhydrolase domain containing 10, depalmitoylase	Cytoplasm	enzyme			55347	213012	303953
AC008060.7	--	Other	other
AC009133.23	--	Other	other
ACTC1	actin alpha cardiac muscle 1	Cytoplasm	enzyme			70	11464	29275
ACTR3C	actin related protein 3C	Cytoplasm	other			653857
ACVR1	activin A receptor type 1	Plasma Membrane	kinase		itacnosertib, INCB000928, LDN-193189, BMP type I receptor kinase inhibitor compound A, SM1-71	90	11477	79558
ADAM9	ADAM metallopeptidase domain 9	Plasma Membrane	peptidase	efficacy,prognosis	IMGC936	8754	11502	290834
ADAMTS2	ADAM metallopeptidase with thrombospondin type 1 motif 2	Extracellular Space	peptidase	diagnosis,efficacy		9509	216725	287899
ADAMTS14	ADAM metallopeptidase with thrombospondin type 1 motif 14	Extracellular Space	peptidase			140766	237360	309837
ADAMTS15	ADAM metallopeptidase with thrombospondin type 1 motif 15	Extracellular Space	peptidase			170689	235130	300474
ADI1	acireductone dioxygenase 1	Nucleus	enzyme			55256	104923	298934
ADIPOR2	adiponectin receptor 2	Plasma Membrane	transmembrane receptor			79602	68465	312670
ADPGK	ADP dependent glucokinase	Plasma Membrane	kinase			83440	72141	315722
ADRA2A	adrenoceptor alpha 2A	Plasma Membrane	G-protein coupled receptor		dexefaroxan, V2006, apraclonidine, methamphetamine, epinephrine/lidocaine, chlorothiazide/methyldopa, azatadine/pseudoephedrine, benzphetamine, naproxen/pseudoephedrine, quinidine, dihydroergotamine, guanethidine, propafenone, tolazoline, brompheniramine/codeine/phenylpropanolamine, loratadine/pseudoephedrine, chlorpheniramine/ibuprofen/pseudoephedrine, brimonidine, dipivefrin, dexmedetomidine, t…	150	11551	25083
AGPAT4	1-acylglycerol-3-phosphate O-acyltransferase 4	Cytoplasm	enzyme			56895	68262	170919
AGR2	anterior gradient 2, protein disulphide isomerase family member	Extracellular Space	other	diagnosis		10551	23795	298961
AICDA	activation induced cytidine deaminase	Cytoplasm	enzyme			57379	11628	399679
Akt	--	Cytoplasm	group	diagnosis,disease progression,efficacy,prognosis,response to therapy,safety	TAS0612, afuresertib, ipatasertib, Akt inhibitor XI, ONC-201, AT13148, SR-13668, MSC2363318A, TAS-117
ALDH2	aldehyde dehydrogenase 2 family member	Cytoplasm	enzyme	unspecified application	disulfiram, disulfiram/gemcitabine, chlorpropamide, ANS-6637	217	11669	29539
ALKBH6	alkB homolog 6	Nucleus	other			84964	233065
ANKHD1/ANKHD1-EIF4EBP3	ankyrin repeat and KH domain containing 1	Cytoplasm	other			54882|404734	108857	100529260
ANKRA2	ankyrin repeat family A member 2	Cytoplasm	transcription regulator			57763	68558	294679
ANKRD10	ankyrin repeat domain 10	Nucleus	transcription regulator			55608	102334	361183
ANKS4B	ankyrin repeat and sterile alpha motif domain containing 4B	Nucleus	transcription regulator			257629	72074	687561
ANPEP	alanyl aminopeptidase, membrane	Plasma Membrane	peptidase	safety,unspecified application	CNGRC peptide-TNF alpha conjugate	290	16790	81641
AP2A1	adaptor related protein complex 2 subunit alpha 1	Cytoplasm	transporter			160	11771	308578
APCDD1	APC down-regulated 1	Plasma Membrane	other			147495	494504	689616
ARF6	ADP ribosylation factor 6	Plasma Membrane	transporter			382	11845	79121
ARHGAP12	Rho GTPase activating protein 12	Cytoplasm	other			94134	75415	307016
ARL4A	ADP ribosylation factor like GTPase 4A	Nucleus	enzyme			10124	11861	29308
ARMCX1	armadillo repeat containing X-linked 1	Other	other			51309	78248
ASB3/GPR75-ASB3	ankyrin repeat and SOCS box containing 3	Cytoplasm	transcription regulator			51130|100302652	65257	364227
ATG5	autophagy related 5	Cytoplasm	other			9474	11793
ATG12	autophagy related 12	Cytoplasm	other			9140	67526	361321
ATG16L1	autophagy related 16 like 1	Cytoplasm	enzyme			55054	77040	363278
ATOH8	atonal bHLH transcription factor 8	Nucleus	transcription regulator			84913	71093	500200
ATP2A2	ATPase sarcoplasmic/endoplasmic reticulum Ca2+ transporting 2	Cytoplasm	transporter			488	11938	29693
ATP8A1	ATPase phospholipid transporting 8A1	Cytoplasm	transporter			10396	11980	289615
ATRX	ATRX chromatin remodeler	Nucleus	transcription regulator	unspecified application		546	22589	246284
AVEN	apoptosis and caspase activation inhibitor	Nucleus	other			57099	74268	311299
B3GNT5	UDP-GlcNAc:betaGal beta-1,3-N-acetylglucosaminyltransferase 5	Cytoplasm	enzyme			84002	108105	116740
BACH1	BTB domain and CNC homolog 1	Nucleus	transcription regulator			571	12013	304127
BAMBI	BMP and activin membrane bound inhibitor	Plasma Membrane	other			25805	68010	83837
BCL6	BCL6 transcription repressor	Nucleus	transcription regulator	diagnosis,efficacy,prognosis,unspecified application		604	12053	303836
BCL2L10	BCL2 like 10	Cytoplasm	other			10017	12049	114552
BCL2L11	BCL2 like 11	Cytoplasm	other	efficacy		10018	12125	64547
BECN1	beclin 1	Cytoplasm	other	efficacy		8678	56208	114558
BEST4	bestrophin 4	Plasma Membrane	other			266675		689103
BLMH	bleomycin hydrolase	Cytoplasm	peptidase			642	104184	287552
BLOC1S6	biogenesis of lysosomal organelles complex 1 subunit 6	Cytoplasm	other			26258	18457	317630
BMP7	bone morphogenetic protein 7	Extracellular Space	growth factor	diagnosis		655	12162	85272
BMPR2	bone morphogenetic protein receptor type 2	Plasma Membrane	kinase	diagnosis,unspecified application		659	12168	140590
BRCA1	BRCA1 DNA repair associated	Nucleus	transcription regulator	diagnosis,efficacy,response to therapy		672	12189	497672
BRK1	BRICK1 subunit of SCAR/WAVE actin nucleating complex	Cytoplasm	other			55845	101314	679934
BSG	basigin (Ok blood group)	Plasma Membrane	transporter	disease progression,prognosis,response to therapy	metuximab	682	12215	25246
BTG3	BTG anti-proliferation factor 3	Nucleus	other			10950	12228	54230
BTN2A1	butyrophilin subfamily 2 member A1	Plasma Membrane	other			11120
C12orf43	chromosome 12 open reading frame 43	Other	other			64897	72357	288704
C19orf12	chromosome 19 open reading frame 12	Cytoplasm	other			83636	72244	690000
C1orf147	chromosome 1 open reading frame 147	Other	other			574431
C5orf24	chromosome 5 open reading frame 24	Other	other			134553	78521	498701
C5orf58	chromosome 5 open reading frame 58	Other	other			133874
C8A	complement C8 alpha chain	Extracellular Space	other			731	230558	298288
C8orf33	chromosome 8 open reading frame 33	Other	other			65265	117171	681282
C9orf72	C9orf72-SMCR8 complex subunit	Cytoplasm	other			203228	73205	313155
CALB2	calbindin 2	Cytoplasm	other	unspecified application		794	12308	117059
CALML4	calmodulin like 4	Other	other			91860	75600	691455
CAMK2N1	calcium/calmodulin dependent protein kinase II inhibitor 1	Plasma Membrane	kinase			55450	66259	287005
CAMP	cathelicidin antimicrobial peptide	Cytoplasm	other	unspecified application		820	12796	316010
CAPN5	calpain 5	Cytoplasm	peptidase			726	12337	171495
CARS1	cysteinyl-tRNA synthetase 1	Cytoplasm	enzyme			833	27267	293638
CASP3	caspase 3	Cytoplasm	peptidase	diagnosis,disease progression,efficacy,unspecified application	caspase 3 inhibitor	836	12367	25402
CASP7	caspase 7	Cytoplasm	peptidase			840	12369	64026
CBFB	core-binding factor subunit beta	Nucleus	transcription regulator			865	12400	361391
CCDC38	coiled-coil domain containing 38	Cytoplasm	other			120935	237465	500823
CCDC117	coiled-coil domain containing 117	Other	other			150275	104479	498404
CCER1	coiled-coil glutamate rich protein 1	Other	other			196477	66716	500825
CCK	cholecystokinin	Extracellular Space	other			885	12424	25298
CCL1	C-C motif chemokine ligand 1	Extracellular Space	cytokine			6346	20290	688605
CCL5	C-C motif chemokine ligand 5	Extracellular Space	cytokine	diagnosis,efficacy,unspecified application		6352	20304	81780
CCL8	C-C motif chemokine ligand 8	Extracellular Space	cytokine	unspecified application		6355
CCN2	cellular communication network factor 2	Extracellular Space	growth factor		FG-3019	1490	14219	64032
CCNA1	cyclin A1	Nucleus	other			8900	12427	295052
CCNA2	cyclin A2	Nucleus	other	efficacy,prognosis		890	12428	114494
CCND1	cyclin D1	Nucleus	transcription regulator	diagnosis,efficacy,prognosis,response to therapy,unspecified application	arsenic trioxide/tretinoin, arsenic trioxide/daunorubicin/tretinoin, arsenic trioxide/gemtuzumab ozogamicin/tretinoin, arsenic trioxide/idarubicin/tretinoin, arsenic trioxide/cytarabine/methotrexate, arsenic trioxide	595	12443	58919
CCNE2	cyclin E2	Nucleus	other			9134	12448	362485
CCNI	cyclin I	Other	other			10983	12453	289500
CCNT2	cyclin T2	Nucleus	transcription regulator			905	72949	304758
CCR3	C-C motif chemokine receptor 3	Plasma Membrane	G-protein coupled receptor			1232	12771	117027
CCSAP	centriole, cilia and spindle associated protein	Cytoplasm	other			126731	73420	307926
CD40	CD40 molecule	Plasma Membrane	transmembrane receptor	efficacy,unspecified application	dacetuzumab, CP-870893, RO7009789, CFZ533, FFP104, SEA-CD40, APX005M, ABBV-927, CDX-1140, bleselumab, chi lob 7/4, anti-CD40 monoclonal antibody, ABBV-428, mitazalimab, lucatumumab	958	21939	171369
CD69	CD69 molecule	Plasma Membrane	transmembrane receptor	efficacy		969	12515	29187
CD99	CD99 molecule (Xg blood group)	Plasma Membrane	other			4267
CD226	CD226 molecule	Plasma Membrane	other			10666	225825	307199
CD1D	CD1d molecule	Plasma Membrane	other			912	12479	25109
CDCP1	CUB domain containing protein 1	Plasma Membrane	other			64866	109332	301082
CDKN3	cyclin dependent kinase inhibitor 3	Cytoplasm	phosphatase			1033	72391
CDKN1A	cyclin dependent kinase inhibitor 1A	Nucleus	kinase	diagnosis,efficacy,prognosis,response to therapy		1026	12575	114851
CDKN2AIP	CDKN2A interacting protein	Nucleus	transcription regulator			55602	70925	306455
CEBPB	CCAAT enhancer binding protein beta	Nucleus	transcription regulator			1051	12608	24253
CENPQ	centromere protein Q	Nucleus	other			55166	83815	363198
CENPS/CENPS-CORT	centromere protein S	Nucleus	other			378708|100526739	69928	100534597
CEP72	centrosomal protein 72	Cytoplasm	other			55722	74470	308064
CEP76	centrosomal protein 76	Cytoplasm	other			79959	225659	291540
CERS5	ceramide synthase 5	Cytoplasm	transcription regulator	diagnosis		91012	71949	366984
CFAP61	cilia and flagella associated protein 61	Cytoplasm	other			26074		311496
CFDP1	craniofacial development protein 1	Extracellular Space	other			10428	23837	292027|313982
CFH	complement factor H	Extracellular Space	other	unspecified application	GT103	3075	12628	155012
CFL2	cofilin 2	Extracellular Space	other			1073	12632	366624
CHCHD1	coiled-coil-helix-coiled-coil-helix domain containing 1	Nucleus	other			118487	66121	361005
CHD1	chromodomain helicase DNA binding protein 1	Nucleus	enzyme		epirubicin/paclitaxel, epirubicin	1105	12648	308215
CHUK	component of inhibitor of nuclear factor kappa B kinase complex	Cytoplasm	kinase	prognosis	bardoxolone methyl	1147	12675	309361
CLIP4	CAP-Gly domain containing linker protein family member 4	Other	other			79745	78785	298801
CLLU1	chronic lymphocytic leukemia up-regulated 1	Other	other			574028
CLVS1	clavesin 1	Cytoplasm	other			157807	74438	366311
CMTM6	CKLF like MARVEL transmembrane domain containing 6	Extracellular Space	cytokine			54918	67213	316035
CMTR2	cap methyltransferase 2	Other	enzyme			55783	234728	292016
CNOT9	CCR4-NOT transcription complex subunit 9	Cytoplasm	transcription regulator			9125	58184	301513
CNRIP1	cannabinoid receptor interacting protein 1	Extracellular Space	other			25927	380686	364208
COL13A1	collagen type XIII alpha 1 chain	Plasma Membrane	other		collagenase	1305	12817	499431
COL1A1	collagen type I alpha 1 chain	Extracellular Space	other	diagnosis	collagenase	1277	12842	29393
COL1A2	collagen type I alpha 2 chain	Extracellular Space	other		collagenase	1278	12843	84352
COL25A1	collagen type XXV alpha 1 chain	Cytoplasm	other		collagenase	84570	77018
COL4A1	collagen type IV alpha 1 chain	Extracellular Space	other	diagnosis	collagenase	1282	12826	290905
COL4A2	collagen type IV alpha 2 chain	Extracellular Space	other		collagenase	1284	12827	306628
COL4A5	collagen type IV alpha 5 chain	Extracellular Space	other	efficacy	collagenase	1287	12830
COL5A1	collagen type V alpha 1 chain	Extracellular Space	other		collagenase	1289	12831	85490
COL5A2	collagen type V alpha 2 chain	Extracellular Space	other		collagenase	1290	12832	85250
COL8A1	collagen type VIII alpha 1 chain	Extracellular Space	other		collagenase	1295	12837	304021
COQ4	coenzyme Q4	Cytoplasm	other			51117	227683	366013
COX6B2	cytochrome c oxidase subunit 6B2	Cytoplasm	enzyme			125965	333182	654441
COX8C	cytochrome c oxidase subunit 8C	Cytoplasm	enzyme			341947
CPLX4	complexin 4	Plasma Membrane	other			339302	225644	361342
CPNE8	copine 8	Cytoplasm	other			144402	66871	362988
CREB1	cAMP responsive element binding protein 1	Nucleus	transcription regulator			1385	12912	81646
CRKL	CRK like proto-oncogene, adaptor protein	Cytoplasm	kinase			1399	12929	287942|100911248
CRP	C-reactive protein	Extracellular Space	other	diagnosis,disease progression,efficacy,prognosis,safety,unspecified application		1401	12944	25419
CRTAP	cartilage associated protein	Extracellular Space	other			10491	56693	102555086
CSAD	cysteine sulfinic acid decarboxylase	Cytoplasm	enzyme			51380	246277	60356
CSF1R	colony stimulating factor 1 receptor	Plasma Membrane	kinase	prognosis	corticosteroid/nilotinib, FPA008, imatinib/inotuzumab ozogamicin, lapatinib/pazopanib, ABSK021, imatinib/sunitinib, WZ-4-145, sunitinib, Q702, regorafenib, dexamethasone/nilotinib/vincristine, pazopanib, quizartinib, dasatinib/nilotinib, SNDX-6352, ARRY-382, nilotinib, imatinib, imatinib/rituximab, SKI-G-801, pexidartinib, nilotinib/rituximab, bosutinib/rituximab, imatinib/nilotinib, NMS-03592088…	1436	12978	307403
CTAGE9 (includes others)	CTAGE family member 9	Other	other			340307|441294|643854|100128553|100142659
CTD_2014B163	--	Other	other
CXCL8	C-X-C motif chemokine ligand 8	Extracellular Space	cytokine	diagnosis,efficacy,prognosis,unspecified application	BMS-986253	3576
CXCL14	C-X-C motif chemokine ligand 14	Extracellular Space	cytokine			9547	57266	306748
CXCR4	C-X-C motif chemokine receptor 4	Plasma Membrane	G-protein coupled receptor	diagnosis	mavorixafor, ulocuplumab, cladribine/cytarabine/filgrastim/idarubicin/plerixafor, balixafortide, BL-8040, LY-2510924, burixafor, USL311, PF-06747143, plerixafor, filgrastim/plerixafor, [68Ga]pentixafor, GMI-1359	7852	12767	60628
CYP24A1	cytochrome P450 family 24 subfamily A member 1	Cytoplasm	enzyme	efficacy,prognosis,unspecified application		1591	13081	25279
CYP4X1	cytochrome P450 family 4 subfamily X member 1	Cytoplasm	enzyme			260293	81906	246767
CYRIA	CYFIP related Rac1 interactor A	Other	other			81553	76820	298890
DBF4	DBF4 zinc finger	Nucleus	kinase			10926	27214	312046
DCAF6	DDB1 and CUL4 associated factor 6	Nucleus	transcription regulator			55827	74106	289181
DCAF12	DDB1 and CUL4 associated factor 12	Cytoplasm	other			25853	68970	682812
DCAF17	DDB1 and CUL4 associated factor 17	Nucleus	other			80067	75763	499807
DCBLD1	discoidin, CUB and LCCL domain containing 1	Extracellular Space	other			285761	66686	309773
DDHD1	DDHD domain containing 1	Extracellular Space	enzyme			80821	114874	305816
DDX11	DEAD/H-box helicase 11	Cytoplasm	enzyme			1663	320209	316767
DDX49	DEAD-box helicase 49	Nucleus	enzyme			54555	234374	290660
DENND10	DENN domain containing 10	Other	other			404636	67894
DEPDC4	DEP domain containing 4	Other	other			120863
DESI2	desumoylating isopeptidase 2	Cytoplasm	enzyme			51029	78825	289277
DIPK1C	divergent protein kinase domain 1C	Other	other			125704	240479	498891
DIS3L	DIS3 like exosome 3'-5' exoribonuclease	Cytoplasm	enzyme			115752	213550	363077
DLGAP1	DLG associated protein 1	Plasma Membrane	other			9229	224997	65040
DMAC2	distal membrane arm assembly component 2	Cytoplasm	other			55101	66349	361520
DMBT1	deleted in malignant brain tumors 1	Plasma Membrane	transmembrane receptor			1755	12945	170568
DNAJB7	DnaJ heat shock protein family (Hsp40) member B7	Other	other			150353	57755	685839
DNAJC12	DnaJ heat shock protein family (Hsp40) member C12	Cytoplasm	other			56521	30045	619393
DNAJC25-GNG10	DNAJC25-GNG10 readthrough	Other	other			552891
DOCK7	dedicator of cytokinesis 7	Plasma Membrane	other			85440	67299	313388
DOK5	docking protein 5	Plasma Membrane	other			55816	76829	502694
DOLPP1	dolichyldiphosphatase 1	Cytoplasm	enzyme			57171	57170	296624
DRAM1	DNA damage regulated autophagy modulator 1	Cytoplasm	other			55332	71712	679937
DSCR8	Down syndrome critical region 8	Other	other			84677
Dst	dystonin	Plasma Membrane	other				13518	316313
DTD1	D-aminoacyl-tRNA deacylase 1	Cytoplasm	enzyme			92675	66044	362227
DTNA	dystrobrevin alpha	Plasma Membrane	other	unspecified application		1837	13527	307548
DTNBP1	dystrobrevin binding protein 1	Plasma Membrane	other	diagnosis		84062	94245	641528
DYNC1LI2	dynein cytoplasmic 1 light intermediate chain 2	Cytoplasm	other			1783	234663	81655
E2F2	E2F transcription factor 2	Nucleus	transcription regulator			1870	242705	684111
E2F3	E2F transcription factor 3	Nucleus	transcription regulator	unspecified application		1871	13557	291105
E2F5	E2F transcription factor 5	Nucleus	transcription regulator			1875	13559	116651
E2F7	E2F transcription factor 7	Nucleus	transcription regulator			144455	52679	314818
EDNRA	endothelin receptor type A	Plasma Membrane	transmembrane receptor		bosentan, avosentan, clazosentan, ambrisentan, sitaxsentan, zibotentan, SB 234551, TBC 3214, BSF 302146, YM598, macitentan, ambrisentan/tadalafil, fandosentan, atrasentan	1909	13617	24326
EED	embryonic ectoderm development	Nucleus	transcription regulator		MAK683	8726	13626	293104
EGR2	early growth response 2	Nucleus	transcription regulator			1959	13654	114090
ELAVL2	ELAV like RNA binding protein 2	Cytoplasm	other			1993	15569	286973
ELMOD2	ELMO domain containing 2	Other	other			255520	244548	688581
ELOVL3	ELOVL fatty acid elongase 3	Cytoplasm	enzyme			83401	12686	309449
ELOVL5	ELOVL fatty acid elongase 5	Cytoplasm	enzyme			60481	68801	171400
ENPP5	ectonucleotide pyrophosphatase/phosphodiesterase family member 5	Extracellular Space	enzyme			59084	83965	316249
ENSA	endosulfine alpha	Cytoplasm	transporter			2029	56205	60334
EPC1	enhancer of polycomb homolog 1	Nucleus	transcription regulator			80314	13831	100362678
EREG	epiregulin	Extracellular Space	growth factor	prognosis,response to therapy		2069	13874	59325
ESR1	estrogen receptor 1	Nucleus	ligand-dependent nuclear receptor	diagnosis,disease progression,efficacy,prognosis,response to therapy,unspecified application	anastrozole/fulvestrant/goserelin/tamoxifen, anastrozole/fulvestrant/tamoxifen, goserelin/tamoxifen, anastrozole/exemestane/fulvestrant/tamoxifen, ethinyl estradiol/norgestimate, fluoxymesterone, estradiol/levonorgestrel, etonogestrel, 4-hydroxytamoxifen, exemestane/fulvestrant/letrozole/tamoxifen, fulvestrant, estradiol valerate/testosterone enanthate, arzoxifene, ethinyl estradiol/etonogestrel,…	2099	13982	24890
EVX2	even-skipped homeobox 2	Nucleus	transcription regulator			344191	14029	288155
EXTL2	exostosin like glycosyltransferase 2	Cytoplasm	enzyme			2135	58193	310803
F2	coagulation factor II, prothrombin	Extracellular Space	peptidase	diagnosis,unspecified application	ximelagatran, argatroban, aspirin/dabigatran etexilate, desirudin, efegatran, enoxaparin, dabigatran, dabigatran etexilate, aspirin/eptifibatide/heparin, tinzaparin, bivalirudin, lepirudin, thrombin inhibitor, ulinastatin, heparin, aspirin/bivalirudin	2147	14061	29251
F3	coagulation factor III, tissue factor	Plasma Membrane	transmembrane receptor	efficacy,unspecified application	tisotumab vedotin, ALT-836	2152	14066	25584
F8A1 (includes others)	coagulation factor VIII associated 1	Nucleus	other			8263|474383|474384	14070	501661
FADD	Fas associated via death domain	Cytoplasm	other	diagnosis,disease progression		8772	14082	266610
FAM120AOS	family with sequence similarity 120A opposite strand	Other	other			158293
FAM133A	family with sequence similarity 133 member A	Other	other			286499
FAM222B	family with sequence similarity 222 member B	Nucleus	other			55731	216971	497960
FAM24A	family with sequence similarity 24 member A	Other	other			118670
FAM32A	family with sequence similarity 32 member A	Nucleus	other			26017	67922	498600
FAM43A	family with sequence similarity 43 member A	Other	other			131583	224093	288031
FAM81A	family with sequence similarity 81 member A	Other	other			145773	76886	315789
FAM83F	family with sequence similarity 83 member F	Other	other			113828	213956	315145
FAP	fibroblast activation protein alpha	Cytoplasm	peptidase		RO7122290, gallium Ga 68 FAPi-46, gallium Ga 68 FAP-2286, RO6874281, RO6874813	2191	14089	192203
FBXO33	F-box protein 33	Other	other			254170	70611	314157
FBXO45	F-box protein 45	Plasma Membrane	other			200933	268882	288042
FBXO48	F-box protein 48	Other	other			554251	319701	364205
FICD	FIC domain protein adenylyltransferase	Nucleus	enzyme			11153	231630	288741
FKBP14	FKBP prolyl isomerase 14	Cytoplasm	enzyme			55033	231997	362366
FOXG1	forkhead box G1	Nucleus	transcription regulator	prognosis		2290	15228	24370
FOXR2	forkhead box R2	Nucleus	transcription regulator			139628	436240	302583
FRG1	FSHD region gene 1	Nucleus	transporter			2483	14300	686103|689484
FXR2	FMR1 autosomal homolog 2	Cytoplasm	other			9513	23879	287433
FZD3	frizzled class receptor 3	Plasma Membrane	G-protein coupled receptor			7976	14365	266715
GABRB1	gamma-aminobutyric acid type A receptor subunit beta1	Plasma Membrane	ion channel		triazolam, methohexital, nitrazepam, sevoflurane, etomidate, lindane, pagoclone, aspirin/butalbital/caffeine, zolpidem, atropine/hyoscyamine/phenobarbital/scopolamine, phenobarbital, isoflurane, diazepam, halothane, pentobarbital, acetaminophen/butalbital/caffeine/codeine, hyoscyamine/phenobarbital, amobarbital, SEP 174559, desflurane, adinazolam, zaleplon, mephobarbital, pregnenolone, enflurane,…	2560	14400	25450
GALNT1	polypeptide N-acetylgalactosaminyltransferase 1	Cytoplasm	enzyme			2589	14423	79214
GALNT7	polypeptide N-acetylgalactosaminyltransferase 7	Cytoplasm	enzyme			51809	108150	29750
GALP	galanin like peptide	Extracellular Space	other			85569	232836	64568
GAN	gigaxonin	Cytoplasm	other			8139	209239	307893
GCSAM	germinal center associated signaling and motility	Cytoplasm	other			257144	14525	685692
GMNC	geminin coiled-coil domain containing	Nucleus	other			647309	239789	498102
GNA13	G protein subunit alpha 13	Plasma Membrane	enzyme			10672	14674	303634
GNAI2	G protein subunit alpha i2	Plasma Membrane	enzyme			2771	14678	81664
GNG10	G protein subunit gamma 10	Plasma Membrane	enzyme			2790	14700	114119
GNPDA1	glucosamine-6-phosphate deaminase 1	Cytoplasm	enzyme			10007	26384	683570
GOLGA7B	golgin A7 family member B	Other	other			401647	71146	309378
GPD2	glycerol-3-phosphate dehydrogenase 2	Cytoplasm	enzyme			2820	14571	25062
GPM6B	glycoprotein M6B	Plasma Membrane	other			2824	14758
GRIN2B	glutamate ionotropic receptor NMDA type subunit 2B	Plasma Membrane	ion channel	diagnosis,unspecified application	dextromethorphan/morphine, neramexane, bicifadine, delucemine, nebostinel, besonprodil, UK-240455, tenocyclidine, dextromethorphan/quinidine, donepezil/memantine, felbamate, ifenprodil, memantine, orphenadrine, cycloserine, N-(2-indanyl)glycinamide, dextromethorphan, brompheniramine/dextromethorphan/pseudoephedrine, chlorpheniramine/dextromethorphan/phenylephrine, carbinoxamine/dextromethorphan/p…	2904	14812	24410
GSKIP	GSK3B interacting protein	Nucleus	other			51527	66787	362778
GXYLT1	glucoside xylosyltransferase 1	Cytoplasm	enzyme			283464	223827	300173
H4C15	H4 clustered histone 15	Nucleus	other			554313	326619
HBP1	HMG-box transcription factor 1	Nucleus	transcription regulator			26959	73389	27080
HDAC7	histone deacetylase 7	Nucleus	transcription regulator		tributyrin, belinostat, pyroxamide	51564	56233	84582
HDAC8	histone deacetylase 8	Nucleus	transcription regulator		tributyrin, NBM-BMX, belinostat, pyroxamide, R 306465	55869	70315	363481
HECTD2	HECT domain E3 ubiquitin protein ligase 2	Cytoplasm	enzyme			143279	226098	309514
HERPUD1	homocysteine inducible ER protein with ubiquitin like domain 1	Cytoplasm	other			9709	64209	85430
HILPDA	hypoxia inducible lipid droplet associated	Cytoplasm	other	diagnosis		29923	69573	100361568
HIPK3	homeodomain interacting protein kinase 3	Nucleus	kinase			10114	15259	83617
HMGA2-AS1	HMGA2 antisense RNA 1	Other	other			100129940
HNRNPD	heterogeneous nuclear ribonucleoprotein D	Nucleus	transcription regulator			3184	11991	79256
HNRNPM	heterogeneous nuclear ribonucleoprotein M	Nucleus	other			4670	76936	116655
HOATZ	HOATZ cilia and flagella associated protein	Other	other			399949	235345	100359479
HOXA1	homeobox A1	Nucleus	transcription regulator			3198	15394	103690132
HSPA1A/HSPA1B	heat shock protein family A (Hsp70) member 1A	Cytoplasm	enzyme	unspecified application		3303|3304	193740	24472|294254
HTN3	histatin 3	Extracellular Space	other			3347
HTR1E	5-hydroxytryptamine receptor 1E	Plasma Membrane	G-protein coupled receptor		dihydroergotamine, fenfluramine, ergotamine, eletriptan, caffeine/ergotamine	3354
HTR1F	5-hydroxytryptamine receptor 1F	Plasma Membrane	G-protein coupled receptor		naproxen/sumatriptan, lasmiditan, olanzapine/samidorphan, dexamethasone/olanzapine, sumatriptan, eletriptan, almotriptan, fenfluramine, olanzapine, ergotamine, naratriptan, zolmitriptan, rizatriptan	3355	15557	60448
HTR2C	5-hydroxytryptamine receptor 2C	Plasma Membrane	G-protein coupled receptor	safety	pimavanserin, methysergide, ziprasidone, lorcaserin, agomelatine, ergotamine, doxepin, asenapine, chlorprothixene, trazodone, fenfluramine, dihydroergotamine, quetiapine, olanzapine/samidorphan, opipramol, apomorphine, lisuride, clomipramine, epinastine, fenfluramine/phentermine, paliperidone, sertindole, risperidone, cyproheptadine, blonanserin, vabicaserin, fluoxetine/olanzapine, mirtazapine, a…	3358	15560	25187
ID4	inhibitor of DNA binding 4, HLH protein	Nucleus	transcription regulator	prognosis		3400	15904	291023
IDH1	isocitrate dehydrogenase (NADP(+)) 1	Cytoplasm	enzyme	unspecified application	olutasidenib, IDH305, ivosidenib, DS-1001, HMPL-306, BAY1436032, IDH1 inhibitor, LY3410738	3417	15926	24479
IER2	immediate early response 2	Cytoplasm	transcription regulator			9592	15936	494344
IER3	immediate early response 3	Cytoplasm	other	unspecified application		8870	15937	294235
IFNA1/IFNA13	interferon alpha 1	Extracellular Space	cytokine	diagnosis		3439|3447
IFNB1	interferon beta 1	Extracellular Space	cytokine			3456	15977	24481
IFRD1	interferon related developmental regulator 1	Nucleus	other			3475	15982	29596
IGSF1	immunoglobulin superfamily member 1	Plasma Membrane	other			3547	209268	302822
IL3	interleukin 3	Extracellular Space	cytokine			3562
IL7	interleukin 7	Extracellular Space	cytokine	efficacy,unspecified application	MK-1966	3574	16196	25647
IL10	interleukin 10	Extracellular Space	cytokine	diagnosis,disease progression,efficacy,prognosis,response to therapy,safety,unspecified application	SCH708980	3586	16153	25325
IL37	interleukin 37	Extracellular Space	cytokine			27178
IL12RB2	interleukin 12 receptor subunit beta 2	Plasma Membrane	transmembrane receptor			3595	16162	171334
IL17A	interleukin 17A	Extracellular Space	cytokine	diagnosis,efficacy,unspecified application	IL17 inhibitor, secukinumab, ixekizumab, CJM112, ABY-035, bimekizumab, methotrexate/secukinumab, BCD-085, ixekizumab/methotrexate	3605	16171	301289
IL1F10	interleukin 1 family member 10	Extracellular Space	cytokine			84639	215274	362077
IL1R1	interleukin 1 receptor type 1	Plasma Membrane	transmembrane receptor		anakinra, anakinra/methotrexate, anakinra/colchicine	3554	16177	25663
IL1RAP	interleukin 1 receptor accessory protein	Plasma Membrane	transmembrane receptor		CAN04	3556	16180	25466
IL1RAPL2	interleukin 1 receptor accessory protein like 2	Plasma Membrane	transmembrane receptor			26280	60367	300913
IL1RL2	interleukin 1 receptor like 2	Plasma Membrane	transmembrane receptor			8808	107527	171106
IL36A	interleukin 36 alpha	Extracellular Space	cytokine			27179	54448	296541
IL36B	interleukin 36 beta	Extracellular Space	cytokine			27177	69677	362076
IL36G	interleukin 36 gamma	Extracellular Space	cytokine			56300	215257	499744
IL36RN	interleukin 36 receptor antagonist	Extracellular Space	cytokine			26525	54450	311783
INO80D	INO80 complex subunit D	Nucleus	other			54891	227195	316440
IP6K3	inositol hexakisphosphate kinase 3	Cytoplasm	kinase			117283	271424	688862
IRAK1	interleukin 1 receptor associated kinase 1	Plasma Membrane	kinase		1-(3-hydroxypropyl)-2-[(3-nitrobenzoyl)amino]-1H-benzimidazol-5-yl pivalate, R191	3654	16179	363520
IRAK2	interleukin 1 receptor associated kinase 2	Plasma Membrane	kinase			3656	108960	362418
IRF5	interferon regulatory factor 5	Nucleus	transcription regulator			3663	27056	296953
IRS1	insulin receptor substrate 1	Cytoplasm	enzyme	efficacy	NT219	3667	16367	25467
IRS4	insulin receptor substrate 4	Plasma Membrane	other			8471
ITGA2	integrin subunit alpha 2	Plasma Membrane	transmembrane receptor			3673	16398	170921
ITGA8	integrin subunit alpha 8	Plasma Membrane	other			8516	241226	364786
JPT1	Jupiter microtubule associated homolog 1	Nucleus	other	unspecified application		51155	15374	287828
JUN	Jun proto-oncogene, AP-1 transcription factor subunit	Nucleus	transcription regulator	prognosis		3725	16476	24516
KANK2	KN motif and ankyrin repeat domains 2	Nucleus	transcription regulator			25959	235041	100361376
KCNAB3	potassium voltage-gated channel subfamily A regulatory beta subunit 3	Plasma Membrane	ion channel			9196	16499	58981
KCNJ1	potassium inwardly rectifying channel subfamily J member 1	Plasma Membrane	ion channel		glimepiride/rosiglitazone, glimepiride/pioglitazone, tolazamide, acetohexamide, glimepiride, agmatine	3758	56379	24521
KCNK10	potassium two pore domain channel subfamily K member 10	Plasma Membrane	ion channel			54207	72258	65272
KCTD6	potassium channel tetramerization domain containing 6	Plasma Membrane	ion channel			200845	71393	305792
KDM4D	lysine demethylase 4D	Nucleus	enzyme			55693	244694	689582|100909834
KDM6B	lysine demethylase 6B	Extracellular Space	enzyme			23135	216850	363630
KIF22	kinesin family member 22	Nucleus	other	diagnosis,prognosis		3835	110033	293502
KIR2DL2	killer cell immunoglobulin like receptor, two Ig domains and long cytoplasmic tail 2	Plasma Membrane	other			3803
KIR2DL1/KIR2DL3	killer cell immunoglobulin like receptor, two Ig domains and long cytoplasmic tail 3	Plasma Membrane	other			3802|3804
KLHL20	kelch like family member 20	Plasma Membrane	enzyme			27252	226541	304920
KLHL28	kelch like family member 28	Other	other			54813	66689	299103
KRT7	keratin 7	Cytoplasm	other	unspecified application		3855	110310	300242
KRT85	keratin 85	Extracellular Space	other			3891		407762
KRTAP1-5	keratin associated protein 1-5	Cytoplasm	other			83895	629873	100361571
KRTAP13-1	keratin associated protein 13-1	Cytoplasm	other			140258	268905	100363184
KSR2	kinase suppressor of ras 2	Cytoplasm	kinase			283455	333050	288691
KXD1	KxDL motif containing 1	Cytoplasm	other			79036	75620	498606
LALBA	lactalbumin alpha	Extracellular Space	enzyme			3906	16770	24528
LAMC1	laminin subunit gamma 1	Extracellular Space	other			3915	226519	117036
LANCL1	LanC like 1	Plasma Membrane	enzyme			10314	14768	114515
LARP6	La ribonucleoprotein 6, translational regulator	Cytoplasm	other			55323	67557	315731
LARP7	La ribonucleoprotein 7, transcriptional regulator	Nucleus	other			51574	28036	686883
LASP1	LIM and SH3 protein 1	Cytoplasm	transporter			3927	16796	29278
LBP	lipopolysaccharide binding protein	Plasma Membrane	transporter	diagnosis,efficacy		3929	16803	29469
LCA5L	lebercilin LCA5 like	Extracellular Space	other			150082	385668	498065
LEPROT	leptin receptor overlapping transcript	Plasma Membrane	other			54741	230514	56766
LGI1	leucine rich glioma inactivated 1	Plasma Membrane	other			9211	56839	252892
LGSN	lengsin, lens protein with glutamine synthetase domain	Plasma Membrane	enzyme			51557	266744	316304
LHX1	LIM homeobox 1	Nucleus	transcription regulator			3975	16869	257634
LHX8	LIM homeobox 8	Nucleus	transcription regulator			431707	16875	365963
LHX9	LIM homeobox 9	Nucleus	transcription regulator			56956	16876	289048
LIN28A	lin-28 homolog A	Cytoplasm	other			79727	83557	500562
LIN28B	lin-28 homolog B	Cytoplasm	other			389421	380669	689054
LINC00908	long intergenic non-protein coding RNA 908	Other	other			284276
LINC01118	long intergenic non-protein coding RNA 1118	Other	other			388948
LINC01148	long intergenic non-protein coding RNA 1148	Other	other			283585
LMBR1L	limb development membrane protein 1 like	Plasma Membrane	transmembrane receptor			55716	74775
LMNB2	lamin B2	Nucleus	other			84823	16907	299625
LNPK	lunapark, ER junction formation factor	Cytoplasm	other			80856	69605	362151
LOXL2	lysyl oxidase like 2	Extracellular Space	enzyme		PAT-1251, simtuzumab	4017	94352	290350
LOXL4	lysyl oxidase like 4	Extracellular Space	enzyme			84171	67573	309380
LPAR2	lysophosphatidic acid receptor 2	Plasma Membrane	G-protein coupled receptor			9170	53978	498609
LRMDA	leucine rich melanocyte differentiation associated	Other	other			83938	76633	681383
LRRC17	leucine rich repeat containing 17	Extracellular Space	other			10234	74511	502715
LRRC8C	leucine rich repeat containing 8 VRAC subunit C	Plasma Membrane	ion channel			84230	100604	289443
LRRC8D	leucine rich repeat containing 8 VRAC subunit D	Plasma Membrane	G-protein coupled receptor			55144	231549	305131
LTB	lymphotoxin beta	Extracellular Space	cytokine	safety,unspecified application		4050	16994	361795
LTF	lactotransferrin	Extracellular Space	peptidase	efficacy,unspecified application		4057	17002	301034
LTN1	listerin E3 ubiquitin protein ligase 1	Nucleus	enzyme			26046	78913	288308
MAGEB2	MAGE family member B2	Cytoplasm	other			4113	434903	302744
MALAT1	metastasis associated lung adenocarcinoma transcript 1	Nucleus	other			378938	72289
MANBAL	mannosidase beta like	Other	other			63905	69161	499934
MAP3K2	mitogen-activated protein kinase kinase kinase 2	Cytoplasm	kinase			10746	26405	171492
MAP4K4	mitogen-activated protein kinase kinase kinase kinase 4	Cytoplasm	kinase		PF-06260933, GNE-495, NCB-0846	9448	26921	301363
MAPRE3	microtubule associated protein RP/EB family member 3	Cytoplasm	enzyme			22924	100732	298848
MAT2A	methionine adenosyltransferase 2A	Cytoplasm	enzyme		AG-270	4144	232087	171347
MATN1	matrilin 1	Extracellular Space	other			4146	17180	297894
MBNL1	muscleblind like splicing regulator 1	Nucleus	other			4154	56758	282635
MCM10	minichromosome maintenance 10 replication initiation factor	Nucleus	other			55388	70024	307126
MCPH1	microcephalin 1	Nucleus	other			79648	244329	306594
MDM4	MDM4 regulator of p53	Nucleus	transcription regulator	unspecified application	ALRN-6924	4194	17248	304798
MEF2B	myocyte enhancer factor 2B	Nucleus	transcription regulator			100271849	17259	498607
MEIOB	meiosis specific with OB-fold	Cytoplasm	enzyme			254528	75178	685099
MET	MET proto-oncogene, receptor tyrosine kinase	Plasma Membrane	kinase	diagnosis,disease progression,efficacy,prognosis,response to therapy,unspecified application	XL092, EMD 1204831, kanitinib, bozitinib, cabozantinib/crizotinib, TR1801, ARGX-111, glumetinib, OMO-1, MK2461, RPI-1, crizotinib, ABN401, ABT-700, HLX55, LY2875358, capmatinib/gefitinib, SAR125844, crizotinib/vemurafenib, merestinib, SM1-71, glesatinib, cabozantinib, crizotinib/erlotinib, antibody-drug conjugate ABBV-399, SHR-A1403, GST-HG161, cabozantinib/tyrosine kinase inhibitor, volitinib, T…	4233	17295	24553
METTL7A	methyltransferase like 7A	Cytoplasm	other			25840	70152	315306
MEX3B	mex-3 RNA binding family member B	Cytoplasm	kinase			84206	108797	308790
MEX3C	mex-3 RNA binding family member C	Cytoplasm	enzyme			51320	240396	307271
MIB1	MIB E3 ubiquitin protein ligase 1	Cytoplasm	enzyme	diagnosis,efficacy		57534	225164	307594
MIER3	MIER family member 3	Nucleus	transcription regulator			166968	218613	310086
MKRN3	makorin ring finger protein 3	Nucleus	enzyme			7681	22652	292988
MLLT1	MLLT1 super elongation complex subunit	Nucleus	transcription regulator			4298	64144	301119
MLLT11	MLLT11 transcription factor 7 cofactor	Cytoplasm	other			10962	56772	295264
MMP16	matrix metallopeptidase 16	Extracellular Space	peptidase		marimastat	4325	17389	65205
MPDU1	mannose-P-dolichol utilization defect 1	Cytoplasm	other			9526	24070	303244
MR1	major histocompatibility complex, class I-related	Plasma Membrane	transmembrane receptor		anti-thymocyte globulin (rabbit)	3140	15064	25119
MRFAP1	Morf4 family associated protein 1	Nucleus	other			93621	67568	282585
MRPL36	mitochondrial ribosomal protein L36	Cytoplasm	other			64979	94066	364656|100910528
MS4A1	membrane spanning 4-domains A1	Plasma Membrane	other	efficacy,prognosis,unspecified application	idelalisib/ofatumumab, IGM-2323, methotrexate/ofatumumab, cytarabine/fludarabine phosphate/oxaliplatin/rituximab, epcoritamab, cyclophosphamide/dexamethasone/rituximab, anti-CD20 antibody, idelalisib/rituximab, chlorambucil/mitoxantrone/prednisone/rituximab, methylprednisolone/rituximab, anti-CD20 B9E9 scfv-streptavidin fusion protein, carfilzomib/dexamethasone/rituximab, ublituximab, panobinosta…	931	12482	309217
MSANTD3-TMEFF1	MSANTD3-TMEFF1 readthrough	Other	other			100526694
MTCH2	mitochondrial carrier 2	Cytoplasm	other			23788	56428	295922
MTDH	metadherin	Cytoplasm	transcription regulator	prognosis		92140	67154	170910
MTRES1	mitochondrial transcription rescue factor 1	Cytoplasm	other			51250	67851	683897
MYB	MYB proto-oncogene, transcription factor	Nucleus	transcription regulator			4602	17863
MYH13	myosin heavy chain 13	Cytoplasm	other			8735	544791	29605
MYLIP	myosin regulatory light chain interacting protein	Cytoplasm	enzyme			29116	218203	306825
MYO10	myosin X	Cytoplasm	enzyme			4651	17909	310178
NABP1	nucleic acid binding protein 1	Nucleus	other			64859	109019	363227
NABP2	nucleic acid binding protein 2	Nucleus	other			79035	69917	362813
NAF1	nuclear assembly factor 1 ribonucleoprotein	Cytoplasm	other			92345	234344	306387
NAPG	NSF attachment protein gamma	Cytoplasm	transporter			8774	108123
NCEH1	neutral cholesterol ester hydrolase 1	Plasma Membrane	enzyme			57552	320024	294930
NCL	nucleolin	Nucleus	other		AGRO 100	4691	17975	25135
NECAP1	NECAP endocytosis associated 1	Plasma Membrane	other			25977	67602	312694
NEDD4	NEDD4 E3 ubiquitin protein ligase	Cytoplasm	enzyme			4734
NEUROD1	neuronal differentiation 1	Nucleus	transcription regulator			4760	18012	29458
NFIB	nuclear factor I B	Nucleus	transcription regulator			4781	18028	29227
NFIX	nuclear factor I X	Nucleus	transcription regulator			4784	18032	81524
NID1	nidogen 1	Extracellular Space	other			4811	18073	25494
NID2	nidogen 2	Extracellular Space	other			22795	18074	302248
NLGN1	neuroligin 1	Plasma Membrane	enzyme			22871	192167	116647
NOS2	nitric oxide synthase 2	Cytoplasm	enzyme	diagnosis	pimagedine, triflusal, N(G)-monomethyl-D-arginine, GW 273629	4843	18126	24599|497963
NOVA1	NOVA alternative splicing regulator 1	Nucleus	other			4857	664883	298992
NPR3	natriuretic peptide receptor 3	Plasma Membrane	G-protein coupled receptor		linaclotide, nesiritide	4883	18162	25339
NR4A2	nuclear receptor subfamily 4 group A member 2	Nucleus	ligand-dependent nuclear receptor			4929	18227	54278
NSL1	NSL1 component of MIS12 kinetochore complex	Nucleus	other			25936	381318	498310
NT5C3A	5'-nucleotidase, cytosolic IIIA	Cytoplasm	phosphatase			51251	107569	312373
NT5E	5'-nucleotidase ecto	Plasma Membrane	phosphatase		Sym024, MEDI9447, CPI-006, NZV930, BMS-986179, LY3475070, TJ004309, AB680, GS-1423, AK119	4907	23959	58813
NUBPL	nucleotide binding protein like	Cytoplasm	other			80224	76826	299008
NUCB1	nucleobindin 1	Cytoplasm	other	diagnosis		4924	18220	84595
NUFIP2	nuclear FMR1 interacting protein 2	Cytoplasm	other			57532	68564	681371
OMG	oligodendrocyte myelin glycoprotein	Plasma Membrane	G-protein coupled receptor			4974	18377	450224
OPALIN	oligodendrocytic myelin paranodal and inner loop protein	Cytoplasm	other			93377	226115	361757
OR56B4	olfactory receptor family 56 subfamily B member 4	Plasma Membrane	G-protein coupled receptor			196335	257914	293314|405295
OR9Q1	olfactory receptor family 9 subfamily Q member 1	Plasma Membrane	G-protein coupled receptor			219956	258097	293812
OSER1	oxidative stress responsive serine rich 1	Other	enzyme			51526	66680	296346
P3H1	prolyl 3-hydroxylase 1	Nucleus	enzyme			64175	56401	114200
P4HA2	prolyl 4-hydroxylase subunit alpha 2	Cytoplasm	transporter			8974	18452	360526
PA2G4	proliferation-associated 2G4	Nucleus	transcription regulator			5036	18813	288778
PAAF1	proteasomal ATPase associated factor 1	Other	other			80227
PABPC1L2B	poly(A) binding protein cytoplasmic 1 like 2B	Cytoplasm	other			645974
PAFAH1B2	platelet activating factor acetylhydrolase 1b catalytic subunit 2	Cytoplasm	enzyme			5049	18475	64189
PARP16	poly(ADP-ribose) polymerase family member 16	Cytoplasm	enzyme			54956	214424	315760
PATE2	prostate and testis expressed 2	Extracellular Space	other			399967	330921	100361465
PBLD	phenazine biosynthesis like protein domain containing	Cytoplasm	enzyme			64081	68371	171564|100360692
PBOV1	prostate and breast cancer overexpressed 1	Nucleus	other			59351
PBRM1	polybromo 1	Nucleus	other			55193	66923	306254
PBX3	PBX homeobox 3	Nucleus	transcription regulator			5090	18516	311876
PCGF3	polycomb group ring finger 3	Nucleus	other			10336	69587	305624
PDCD1LG2	programmed cell death 1 ligand 2	Plasma Membrane	enzyme	efficacy	CA-170, anti PD-L2 antibody	80380	58205	309304
PDCD2L	programmed cell death 2 like	Other	other			84306	68079	689637
PDE4DIP	phosphodiesterase 4D interacting protein	Cytoplasm	enzyme	unspecified application		9659	83679	64183
PDE7A	phosphodiesterase 7A	Cytoplasm	enzyme		dyphylline, anagrelide, milrinone, dipyridamole, ketotifen, tolbutamide, theophylline, pentoxifylline	5150	18583	81744
PDGFA	platelet derived growth factor subunit A	Extracellular Space	growth factor			5154	18590	25266
PDGFB	platelet derived growth factor subunit B	Extracellular Space	growth factor	disease progression,unspecified application	sunitinib, pegpleranib, imatinib/sunitinib, regorafenib/sunitinib	5155	18591	24628
PDGFRA	platelet derived growth factor receptor alpha	Plasma Membrane	kinase	efficacy,prognosis,safety,unspecified application	cytarabine/midostaurin, lenvatinib/pembrolizumab, crizotinib/pazopanib, blinatumomab/imatinib, bosutinib/imatinib, docetaxel/nintedanib, everolimus/lenvatinib, CT 52923, decitabine/imatinib, ripretinib, SU9518, nintedanib, regorafenib/sunitinib, NCB-0846, dexamethasone/imatinib/vincristine, dasatinib, imatinib/sirolimus, imatinib/sorafenib, avapritinib, corticosteroid/imatinib, midostaurin, filgr…	5156	18595	25267
PDIK1L	PDLIM1 interacting kinase 1 like	Nucleus	kinase			149420	230809	313609
PEA15	proliferation and apoptosis adaptor protein 15	Cytoplasm	transporter	prognosis		8682	18611	364052
PERP	p53 apoptosis effector related to PMP22	Plasma Membrane	other			64065	64058	292949
PEX11B	peroxisomal biogenesis factor 11 beta	Cytoplasm	other			8799	18632	310682
PEX11G	peroxisomal biogenesis factor 11 gamma	Cytoplasm	other			92960	69129	288369
PFN2	profilin 2	Cytoplasm	enzyme			5217	18645	81531|100909840
PGBD2	piggyBac transposable element derived 2	Other	other			267002
PGK2	phosphoglycerate kinase 2	Cytoplasm	kinase			5232	18663	316265
PGLYRP1	peptidoglycan recognition protein 1	Plasma Membrane	transmembrane receptor			8993	21946	84387
PGLYRP2	peptidoglycan recognition protein 2	Plasma Membrane	transmembrane receptor			114770	57757	299567
PGM1	phosphoglucomutase 1	Cytoplasm	enzyme			5236	72157	24645
PGM3	phosphoglucomutase 3	Cytoplasm	enzyme			5238	109785	363109
PHF20L1	PHD finger protein 20 like 1	Other	other			51105	239510	314964
PHKB	phosphorylase kinase regulatory subunit beta	Cytoplasm	kinase			5257	102093	361377
PIK3R2	phosphoinositide-3-kinase regulatory subunit 2	Cytoplasm	kinase			5296	18709	29741
PIN4	peptidylprolyl cis/trans isomerase, NIMA-interacting 4	Nucleus	enzyme			5303	69713	684441
PIP4K2A	phosphatidylinositol-5-phosphate 4-kinase type 2 alpha	Cytoplasm	kinase			5305	18718	116723
PIRT	phosphoinositide interacting regulator of transient receptor potential channels	Plasma Membrane	other			644139	193003	497929
PLAGL2	PLAG1 like zinc finger 2	Nucleus	transcription regulator	disease progression		5326	54711
PLEC	plectin	Cytoplasm	other	unspecified application		5339	18810	64204
PLEKHA3	pleckstrin homology domain containing A3	Cytoplasm	other			65977	83435	295674
PLEKHA4	pleckstrin homology domain containing A4	Cytoplasm	other			57664	69217	308584
PLEKHB2	pleckstrin homology domain containing B2	Other	other			55041	226971	301337
PLK2	polo like kinase 2	Nucleus	kinase			10769	20620	83722
PLOD2	procollagen-lysine,2-oxoglutarate 5-dioxygenase 2	Cytoplasm	enzyme			5352	26432	300901
PLSCR4	phospholipid scramblase 4	Plasma Membrane	enzyme			57088	235527	300900
PLXNB2	plexin B2	Plasma Membrane	transmembrane receptor			23654	140570	315217
PMAIP1	phorbol-12-myristate-13-acetate-induced protein 1	Cytoplasm	other			5366
PMM1	phosphomannomutase 1	Cytoplasm	enzyme			5372	29858	300089
PNP	purine nucleoside phosphorylase	Nucleus	enzyme		forodesine, PD 141955, purine nucleoside phosphorylase inhibitor	4860	18950|667034	290029
POGLUT3	protein O-glucosyltransferase 3	Other	enzyme			143888	68304	315664
POLE2	DNA polymerase epsilon 2, accessory subunit	Nucleus	enzyme		bortezomib/cladribine/rituximab, cladribine/cytarabine/decitabine, cladribine/cytarabine/filgrastim/idarubicin, cladribine/cytarabine/filgrastim/idarubicin/plerixafor, cladribine/recombinant interferon, cladribine, cladribine/cytarabine/filgrastim, cladribine/cytarabine/filgrastim/mitoxantrone, cladribine/cytarabine/daunorubicin, cladribine/rituximab, cladribine/peginterferon alfa-2a	5427	18974	299112
PON2	paraoxonase 2	Plasma Membrane	enzyme			5445	330260	296851
PPARG	peroxisome proliferator activated receptor gamma	Nucleus	ligand-dependent nuclear receptor	diagnosis,efficacy,unspecified application	peroxisome proliferator-activated receptor gamma agonist, glimepiride/rosiglitazone, bezafibrate, clopidogrel/telmisartan, pioglitazone, balsalazide, metformin/rosiglitazone/sulfonylurea, metformin/pioglitazone/sulfonylurea, PPAR gamma inhibitor, inolitazone, telmisartan, INS/metformin/pioglitazone, exenatide/INS/pioglitazone, rosiglitazone, alogliptin/metformin/pioglitazone, tesaglitazar, exenat…	5468	19016	25664
PPARGC1A	PPARG coactivator 1 alpha	Nucleus	transcription regulator	diagnosis,efficacy		10891	19017	83516
PPARGC1B	PPARG coactivator 1 beta	Nucleus	transcription regulator			133522	170826	291567
PPBP	pro-platelet basic protein	Extracellular Space	cytokine			5473
PPID	peptidylprolyl isomerase D	Cytoplasm	enzyme			5481	67738	361967|501204
PPIL3	peptidylprolyl isomerase like 3	Cytoplasm	enzyme			53938	70225	301432
PPM1K	protein phosphatase, Mg2+/Mn2+ dependent 1K	Cytoplasm	phosphatase			152926	243382	312381
PPP1R2	protein phosphatase 1 regulatory inhibitor subunit 2	Cytoplasm	phosphatase	unspecified application		5504	66849	192361
PPP1R18	protein phosphatase 1 regulatory subunit 18	Other	other			170954	76448	361790
PPP3CA	protein phosphatase 3 catalytic subunit alpha	Cytoplasm	phosphatase		voclosporin, tacrolimus, prednisone/tacrolimus, methylprednisolone/tacrolimus, pimecrolimus, cyclosporin A/methotrexate, cyclosporin A	5530	19055	24674
PPP3R1	protein phosphatase 3 regulatory subunit B, alpha	Cytoplasm	phosphatase		cyclosporin A/methotrexate, cyclosporin A	5534	19058	29748
PRDM1	PR/SET domain 1	Nucleus	transcription regulator			639	12142	309871
PRDX4	peroxiredoxin 4	Cytoplasm	enzyme			10549	53381	85274
PRPF40A	pre-mRNA processing factor 40 homolog A	Nucleus	other			55660	56194	295607
PRPF40B	pre-mRNA processing factor 40 homolog B	Nucleus	other			25766	54614	363000
PRR9	proline rich 9	Other	other			574414	109314	100361314
PRR15	proline rich 15	Other	other			222171	78004	312358
PRRG1	proline rich and Gla domain 1	Plasma Membrane	other			5638	546336	363472
PSMA4	proteasome 20S subunit alpha 4	Cytoplasm	peptidase			5685	26441	29671
PSMC1	proteasome 26S subunit, ATPase 1	Nucleus	peptidase			5700	19179	117263
PSTK	phosphoseryl-tRNA kinase	Cytoplasm	kinase			118672	214580	361661
PTAFR	platelet activating factor receptor	Plasma Membrane	G-protein coupled receptor		lexipafant	5724	19204	58949
PTEN	phosphatase and tensin homolog	Cytoplasm	phosphatase	diagnosis,disease progression,efficacy,prognosis,response to therapy,unspecified application		5728	19211	50557
PTGES2	prostaglandin E synthase 2	Cytoplasm	transcription regulator			80142	96979	311865
PTGFRN	prostaglandin F2 receptor inhibitor	Plasma Membrane	other			5738	19221	29602
PTH	parathyroid hormone	Extracellular Space	other	efficacy,safety		5741	19226	24694
PTP4A1	protein tyrosine phosphatase 4A1	Cytoplasm	phosphatase			7803	19243	29463
PTPA	protein phosphatase 2 phosphatase activator	Cytoplasm	phosphatase			5524	110854	362102
PTPN13	protein tyrosine phosphatase non-receptor type 13	Cytoplasm	phosphatase			5783	19249	498331
PTPN20	protein tyrosine phosphatase non-receptor type 20	Extracellular Space	phosphatase			26095	19256	306281
PTPRK	protein tyrosine phosphatase receptor type K	Plasma Membrane	phosphatase			5796	19272	360302
PTRH1	peptidyl-tRNA hydrolase 1 homolog	Cytoplasm	enzyme			138428	329384	362113
PUS10	pseudouridine synthase 10	Other	enzyme			150962	74467	305583
PVRIG	PVR related immunoglobulin domain containing	Plasma Membrane	other		COM701	79037	102640920	680923
PXK	PX domain containing serine/threonine kinase like	Cytoplasm	kinase			54899	218699	306203
R3HDM1	R3H domain containing 1	Other	other			23518	226412	304763
RAB32	RAB32, member RAS oncogene family	Cytoplasm	enzyme			10981	67844	365042
RAB38	RAB38, member RAS oncogene family	Cytoplasm	enzyme			23682	72433	252916
RAB27B	RAB27B, member RAS oncogene family	Cytoplasm	enzyme			5874	80718	84590
RAD23B	RAD23 homolog B, nucleotide excision repair protein	Nucleus	other			5887	19359	298012
RAD54L	RAD54 like	Nucleus	enzyme	diagnosis,unspecified application		8438	19366	298429
RAP1B	RAP1B, member of RAS oncogene family	Cytoplasm	enzyme	unspecified application		5908	215449	171337
RARB	retinoic acid receptor beta	Nucleus	ligand-dependent nuclear receptor	diagnosis,efficacy,prognosis,unspecified application	daunorubicin/tretinoin, alitretinoin, acitretin, mitoxantrone/tretinoin, AGN 190299, etretinate, idarubicin/mitoxantrone/tretinoin, fenretinide, idarubicin/tretinoin, tamibarotene, tazarotene, tretinoin, halobetasol propionate/tazarotene, adapalene, doxorubicin/tretinoin, cytarabine/idarubicin/tretinoin, theophylline/tretinoin/valproic acid, isotretinoin	5915	218772	24706
RARG	retinoic acid receptor gamma	Nucleus	ligand-dependent nuclear receptor		6-mercaptopurine/methotrexate/tretinoin, daunorubicin/tretinoin, alitretinoin, cytarabine/daunorubicin/tretinoin, acitretin, AGN 190299, mitoxantrone/tretinoin, trifarotene, palovarotene, arsenic trioxide/daunorubicin/tretinoin, idarubicin/mitoxantrone/tretinoin, etretinate, idarubicin/tretinoin, fenretinide, tazarotene, tretinoin, arsenic trioxide/gemtuzumab ozogamicin/tretinoin, halobetasol pro…	5916	19411	685072
RARRES1	retinoic acid receptor responder 1	Plasma Membrane	other	diagnosis		5918	109222	310486
RASA1	RAS p21 protein activator 1	Cytoplasm	transporter			5921	218397	25676
RASIP1	Ras interacting protein 1	Cytoplasm	other			54922	69903	292912
RBM24	RNA binding motif protein 24	Cytoplasm	other			221662	666794	690139
RBMS1	RNA binding motif single stranded interacting protein 1	Nucleus	other			5937	56878	362138
RBMXL2	RBMX like 2	Nucleus	other			27288	76572
RCAN1	regulator of calcineurin 1	Nucleus	other			1827	54720
REEP3	receptor accessory protein 3	Other	other			221035	28193	294375
REV1	REV1 DNA directed polymerase	Nucleus	enzyme	unspecified application		51455	56210	316344
RFX6	regulatory factor X6	Nucleus	enzyme			222546	320995	294395
RGPD4 (includes others)	RANBP2 like and GRIP domain containing 5	Nucleus	enzyme			84220|285190|400966|653489|727851|729540|729857	19386
RGS3	regulator of G protein signaling 3	Nucleus	enzyme			5998	50780	54293
RGS4	regulator of G protein signaling 4	Cytoplasm	enzyme			5999	19736	29480
RHEBL1	RHEB like 1	Cytoplasm	enzyme			121268	69159	359959
RHOBTB3	Rho related BTB domain containing 3	Cytoplasm	enzyme			22836	73296	309922
RHOXF2/RHOXF2B	Rhox homeobox family member 2	Nucleus	transcription regulator			84528|727940
RIDA	reactive intermediate imine deaminase A homolog	Cytoplasm	enzyme			10247	15473	65151
RIIAD1	regulatory subunit of type II PKA R-subunit domain containing 1	Other	other			284485	66353	100270669
RNF38	ring finger protein 38	Nucleus	enzyme			152006	73469	171501
RNF148	ring finger protein 148	Extracellular Space	enzyme			378925	71300	681407
RNF144B	ring finger protein 144B	Cytoplasm	enzyme			255488	218215	364681
RORA	RAR related orphan receptor A	Nucleus	ligand-dependent nuclear receptor			6095	19883	300807
RP11-315D16.2	--	Other	other
RP11_160N110	--	Other	other
RP11_497E192	--	Other	other
RP11_65D242	--	Other	other
RP11_674E164	--	Other	other
RP11_738G52	--	Other	other
RP11_739B231	--	Other	other
RP11_76I237	--	Other	other
RPN1	ribophorin I	Cytoplasm	enzyme			6184	103963	25596
RPP38-DT	RPP38 divergent transcript	Other	other			221060
RRAD	RRAD, Ras related glycolysis inhibitor and calcium channel regulator	Cytoplasm	enzyme			6236	56437	83521
RRAGD	Ras related GTP binding D	Cytoplasm	enzyme			58528	52187	297960
RUNX1	RUNX family transcription factor 1	Nucleus	transcription regulator	unspecified application		861	12394	50662
RUNX2	RUNX family transcription factor 2	Nucleus	transcription regulator	disease progression,prognosis,unspecified application		860	12393	367218
S100A12	S100 calcium binding protein A12	Cytoplasm	other	unspecified application		6283
S100PBP	S100P binding protein	Nucleus	other			64766	74648	500551
S1PR1	sphingosine-1-phosphate receptor 1	Plasma Membrane	G-protein coupled receptor		fingolimod phosphate, siponimod, ponesimod, ozanimod	1901	13609	29733
SAMD12	sterile alpha motif domain containing 12	Other	other			401474	320679	362910
SAYSD1	SAYSVFN motif domain containing 1	Other	other			55776	67509
SCAF11	SR-related CTD associated factor 11	Nucleus	other			9169	72193	312030
SCML1	Scm polycomb group protein like 1	Nucleus	transcription regulator			6322
SCN2A	sodium voltage-gated channel alpha subunit 2	Plasma Membrane	ion channel		riluzole, zonisamide	6326	110876	24766
SCN9A	sodium voltage-gated channel alpha subunit 9	Plasma Membrane	ion channel		bupivacaine/lidocaine, epinephrine/lidocaine, lidocaine, riluzole, zonisamide, lidocaine/prilocaine	6335	20274	78956
SDAD1	SDA1 domain containing 1	Nucleus	other			55153	231452	289504
SDCBP2	syndecan binding protein 2	Cytoplasm	other			27111	228765	311532
SEC62	SEC62 homolog, preprotein translocation factor	Cytoplasm	transporter			7095	69276	294912
SEC23A	SEC23 homolog A, COPII coat complex component	Cytoplasm	transporter			10484	20334	58817
SEC61G	SEC61 translocon subunit gamma	Plasma Membrane	transporter			23480	20335|102637269|102640296|108167643|115488348	499136
SFTPD	surfactant protein D	Extracellular Space	other	efficacy		6441	20390	25350
SIGLEC15	sialic acid binding Ig like lectin 15	Plasma Membrane	other		NC318	284266	620235	498888
SLC10A3	solute carrier family 10 member 3	Plasma Membrane	transporter			8273	214601	501665
SLC12A4	solute carrier family 12 member 4	Plasma Membrane	transporter		bumetanide	6560	20498	29501
SLC1A1	solute carrier family 1 member 1	Plasma Membrane	transporter		riluzole	6505	20510	25550
SLC1A2	solute carrier family 1 member 2	Plasma Membrane	transporter		riluzole	6506	20511	29482
SLC35B4	solute carrier family 35 member B4	Cytoplasm	transporter			84912	58246	296969
SLC35C1	solute carrier family 35 member C1	Cytoplasm	transporter	diagnosis		55343	228368	311204
SLC35F1	solute carrier family 35 member F1	Other	other			222553	215085	502421
SLC38A1	solute carrier family 38 member 1	Plasma Membrane	transporter			81539	105727	170567
SLC38A2	solute carrier family 38 member 2	Plasma Membrane	transporter			54407	67760	29642
SLC45A3	solute carrier family 45 member 3	Cytoplasm	transporter	unspecified application		85414	212980	304785
SLC4A7	solute carrier family 4 member 7	Plasma Membrane	transporter			9497	218756	117955
SLC4A10	solute carrier family 4 member 10	Plasma Membrane	transporter			57282	94229	295645
SLC6A19	solute carrier family 6 member 19	Plasma Membrane	transporter			340024	74338	664630
SLC7A1	solute carrier family 7 member 1	Plasma Membrane	transporter			6541	11987	25648
SLC7A5	solute carrier family 7 member 5	Plasma Membrane	transporter	diagnosis		8140	20539	50719
SLC7A10	solute carrier family 7 member 10	Plasma Membrane	transporter			56301	53896	114518
SLC7A11	solute carrier family 7 member 11	Plasma Membrane	transporter		N-acetyl-L-cysteine, (4S)-4-(3-(18F)fluoropropyl)-L-glutamate	23657	26570	310392
SLC9A3R2	SLC9A3 regulator 2	Plasma Membrane	transporter			9351	65962	116501
SLCO6A1	solute carrier organic anion transporter family member 6A1	Plasma Membrane	transporter			133482	67854	170925|102554121
SMAD1	SMAD family member 1	Nucleus	transcription regulator			4086	17125	25671
SMAP1	small ArfGAP 1	Cytoplasm	other			60682	98366	684800
SMIM10	small integral membrane protein 10	Other	other			644538
SMIM17	small integral membrane protein 17	Other	other			147670	100042450	499067
SMOC1	SPARC related modular calcium binding 1	Extracellular Space	other			64093	64075	314280
SNAI1	snail family transcriptional repressor 1	Nucleus	transcription regulator	diagnosis,efficacy		6615	20613	116490
SNX7	sorting nexin 7	Other	transporter			51375	76561	310815
SNX16	sorting nexin 16	Cytoplasm	transporter			64089	74718	64088
SNX30	sorting nexin family member 30	Other	other			401548	209131	298033
SOCS1	suppressor of cytokine signaling 1	Cytoplasm	other	diagnosis,efficacy,safety		8651	12703	252971
SOCS3	suppressor of cytokine signaling 3	Cytoplasm	phosphatase	diagnosis,efficacy		9021	12702	89829
SOX2	SRY-box transcription factor 2	Nucleus	transcription regulator	diagnosis,prognosis,unspecified application		6657	20674	499593
SP5	Sp5 transcription factor	Nucleus	transcription regulator			389058	64406	296510
SPAG7	sperm associated antigen 7	Nucleus	other			9552	216873	303260
SPARC	secreted protein acidic and cysteine rich	Extracellular Space	other	disease progression,efficacy		6678	20692	24791
SPINK13	serine peptidase inhibitor Kazal type 13	Cytoplasm	other			153218	100038417	689570
SPRED1	sprouty related EVH1 domain containing 1	Plasma Membrane	other			161742	114715	296072
SRP14	signal recognition particle 14	Cytoplasm	other			6727	20813	296076
SRSF7	serine and arginine rich splicing factor 7	Nucleus	other			6432	225027	362687
SRSF10	serine and arginine rich splicing factor 10	Nucleus	other			10772	14105
STAC	SH3 and cysteine rich domain	Cytoplasm	other			6769	20840	363152
STAT1	signal transducer and activator of transcription 1	Nucleus	transcription regulator	diagnosis,efficacy,prognosis,response to therapy		6772	20846	25124
STAT3	signal transducer and activator of transcription 3	Nucleus	transcription regulator	diagnosis,efficacy,prognosis,response to therapy	golotimod, OPB-31121, OPB-51602, danvatirsen, TTI-101, STAT3 inhibitor, NT219	6774	20848	25125
STIM2	stromal interaction molecule 2	Plasma Membrane	transporter	efficacy		57620	116873	117087
STOX2	storkhead box 2	Other	other			56977	71069	306459
STRN	striatin	Cytoplasm	other			6801	268980	29149
STX2	syntaxin 2	Cytoplasm	transporter			2054	13852	25130
STX7	syntaxin 7	Plasma Membrane	transporter			8417	53331	60466|100910446
STX1A	syntaxin 1A	Cytoplasm	transporter			6804	20907	116470
SYNGR3	synaptogyrin 3	Plasma Membrane	other			9143	20974	302975
SYPL1	synaptophysin like 1	Plasma Membrane	transporter			6856	19027	366595
SYT1	synaptotagmin 1	Cytoplasm	transporter			6857	20979	25716
SYT4	synaptotagmin 4	Cytoplasm	transporter			6860	20983	64440
SYT8	synaptotagmin 8	Cytoplasm	transporter			90019	55925	60566
SYT14	synaptotagmin 14	Other	transporter			255928	329324	684293
TADA1	transcriptional adaptor 1	Nucleus	transcription regulator			117143	27878	360874
TASOR	transcription activation suppressor	Nucleus	other			23272	218850	680155
TBC1D17	TBC1 domain family member 17	Cytoplasm	other			79735	233204	292886
TCF15	transcription factor 15	Nucleus	transcription regulator			6939	21407	296272
TCF24	transcription factor 24	Other	other			100129654	100039596	680678
TDRKH	tudor and KH domain containing	Cytoplasm	other			11022	72634	310652
TDRP	testis development related protein	Cytoplasm	other			157695	72148	498662
TENT2	terminal nucleotidyltransferase 2	Nucleus	enzyme			167153	100715	361878
TFRC	transferrin receptor	Plasma Membrane	transporter	diagnosis,efficacy	CALAA-01, CX-2029, monoclonal antibody A27.15	7037	22042	64678
TGFBR1	transforming growth factor beta receptor 1	Plasma Membrane	kinase	disease progression,prognosis	YL-13027, galunisertib, SB-505124, SH3051, vactosertib, IN1233, SJN 2511, SB-525334, SM1-71	7046	21812	29591
TGFBR2	transforming growth factor beta receptor 2	Plasma Membrane	kinase		IMC-TR1, SM1-71	7048	21813	81810
TGIF1	TGFB induced factor homeobox 1	Nucleus	transcription regulator			7050	21815	316742
THEM4	thioesterase superfamily member 4	Plasma Membrane	enzyme			117145	75778	361992
TIA1	TIA1 cytotoxic granule associated RNA binding protein	Nucleus	other	unspecified application		7072	21841	312510
TIMELESS	timeless circadian regulator	Nucleus	other			8914	21853	83508
TIMM17B	translocase of inner mitochondrial membrane 17B	Cytoplasm	transporter			10245	21855
TLR1	toll like receptor 1	Plasma Membrane	transmembrane receptor			7096	21897	305354
TLR3	toll like receptor 3	Plasma Membrane	transmembrane receptor		rintatolimod	7098	142980	364594
TLR4	toll like receptor 4	Plasma Membrane	transmembrane receptor	efficacy	eritoran, resatorvid, OM 174 lipid, GSK1795091	7099	21898	29260
TLR9	toll like receptor 9	Plasma Membrane	transmembrane receptor	efficacy	cavrotolimod, MGN1703, ISS-1018, CpG ODN 10104, agatolimod, DV281, GNKG168, tilsotolimod, DUK-CPG-001, hydroxychloroquine, SD-101, HYB-2055	54106	81897	338457
TLR10	toll like receptor 10	Plasma Membrane	transmembrane receptor			81793		305355
TM4SF20	transmembrane 4 L six family member 20	Cytoplasm	other			79853	66261	691066
TMCO1	transmembrane and coiled-coil domains 1	Cytoplasm	ion channel			54499	68944	289196
TMED2	transmembrane p24 trafficking protein 2	Cytoplasm	transporter			10959	56334|100862175	65165
TMED3	transmembrane p24 trafficking protein 3	Cytoplasm	transporter			23423	66111	300888
TMED7	transmembrane p24 trafficking protein 7	Cytoplasm	transporter			51014	66676	252889
TMED10	transmembrane p24 trafficking protein 10	Cytoplasm	transporter			10972	68581|100042773	84599
TMEFF1	transmembrane protein with EGF like and two follistatin like domains 1	Plasma Membrane	other			8577	230157	63845
TMEM59	transmembrane protein 59	Plasma Membrane	peptidase			9528	56374	100196907
TMEM100	transmembrane protein 100	Plasma Membrane	other			55273	67888	497979
TMEM121	transmembrane protein 121	Other	other			80757	69195	691678
TMEM181	transmembrane protein 181	Other	other			57583	77106	502228
TMEM170B	transmembrane protein 170B	Plasma Membrane	other			100113407	621976	361230
TMEM185B	transmembrane protein 185B	Other	other			79134	226351	304731
TMEM41B	transmembrane protein 41B	Cytoplasm	other			440026	233724	361626
TMEM87A	transmembrane protein 87A	Cytoplasm	other			25963	211499	366170
TMSB15A	thymosin beta 15A	Cytoplasm	other			11013
TMSB4Y	thymosin beta 4 Y-linked	Cytoplasm	other			9087
TNFAIP2	TNF alpha induced protein 2	Extracellular Space	other			7127	21928	299339
TNFRSF10B	TNF receptor superfamily member 10b	Plasma Membrane	transmembrane receptor		IGM-8444, INBRX-109, tigatuzumab, conatumumab, drozitumab, dulanermin, DS-8273a, RO6874813, GEN1029	8795
TNFSF13B	TNF superfamily member 13b	Extracellular Space	cytokine	efficacy,response to therapy	tabalumab, belimumab	10673	24099	498666
TNRC6A	trinucleotide repeat containing adaptor 6A	Nucleus	other			27327	233833	308971
TOM1	target of myb1 membrane trafficking protein	Cytoplasm	transporter			10043	21968	361370
TP53	tumor protein p53	Nucleus	transcription regulator	diagnosis,disease progression,efficacy,prognosis,response to therapy,unspecified application	PC14586, eprenetapopt, cenersen, ALT-801, CGM097, kevetrin, azurin 50-77, COTI-2, BI 907828	7157	22059	24842
Tpm1	tropomyosin 1, alpha	Plasma Membrane	other				22003	24851
TRAF6	TNF receptor associated factor 6	Cytoplasm	enzyme			7189	22034	311245
TRAPPC14	trafficking protein particle complex subunit 14	Cytoplasm	other			55262	231807	288545
TRIM14	tripartite motif containing 14	Cytoplasm	other			9830	74735	313236
TRIM71	tripartite motif containing 71	Cytoplasm	enzyme			131405	636931	301042
TRIT1	tRNA isopentenyltransferase 1	Cytoplasm	enzyme			54802	66966	362586
TRMT12	tRNA methyltransferase 12 homolog	Other	other			55039	68260	314999
TRPS1	transcriptional repressor GATA binding 1	Nucleus	transcription regulator	diagnosis,prognosis		7227	83925	299897
TSC1	TSC complex subunit 1	Cytoplasm	other			7248	64930	60445
TTC31	tetratricopeptide repeat domain 31	Other	other			64427
TTI2	TELO2 interacting protein 2	Cytoplasm	other			80185	234138	290811
TTLL7	tubulin tyrosine ligase like 7	Cytoplasm	enzyme			79739	70892	310982
TTPA	alpha tocopherol transfer protein	Cytoplasm	transporter			7274	50500	25571
TUSC2	tumor suppressor 2, mitochondrial calcium regulator	Nucleus	other			11334	80385	501052
TWF1	twinfilin actin binding protein 1	Cytoplasm	kinase			5756	19230	315265
UAP1	UDP-N-acetylglucosamine pyrophosphorylase 1	Nucleus	enzyme			6675	107652	498272
UBC	ubiquitin C	Cytoplasm	enzyme			7316	22190	50522
UBE2D2	ubiquitin conjugating enzyme E2 D2	Cytoplasm	enzyme			7322	56550	641452
UBE2I	ubiquitin conjugating enzyme E2 I	Nucleus	enzyme	disease progression		7329	22196	25573
UBE2V2	ubiquitin conjugating enzyme E2 V2	Cytoplasm	enzyme			7336	70620	287927
UCP3	uncoupling protein 3	Cytoplasm	transporter	diagnosis		7352	22229	25708
UGT2A3	UDP glucuronosyltransferase family 2 member A3	Other	enzyme			79799	72094	289533
UHRF1	ubiquitin like with PHD and ring finger domains 1	Nucleus	transcription regulator			29128	18140	316129
UMODL1-AS1	UMODL1 antisense RNA 1	Other	other			150147
UPP2	uridine phosphorylase 2	Cytoplasm	enzyme			151531	76654	295620
USP45	ubiquitin specific peptidase 45	Nucleus	peptidase			85015	77593	313098
VCAM1	vascular cell adhesion molecule 1	Plasma Membrane	transmembrane receptor	diagnosis,disease progression,efficacy,prognosis,unspecified application		7412	22329	25361
VCAN	versican	Extracellular Space	other			1462	13003	114122
VEGFA	vascular endothelial growth factor A	Extracellular Space	growth factor	diagnosis,efficacy,prognosis,safety,unspecified application	bevacizumab/capecitabine, bevacizumab/temozolomide, bevacizumab/paclitaxel/topotecan, bevacizumab/docetaxel/prednisone/thalidomide/zoledronic acid, bevacizumab/capecitabine/temozolomide, bevacizumab-IRDye 800CW, bevacizumab/5-fluorouracil/irinotecan/oxaliplatin, bevacizumab/irinotecan, bevacizumab/erlotinib, bevacizumab/sorafenib, bevacizumab, brolucizumab, bevacizumab/panitumumab, bevacizumab/ge…	7422	22339	83785
VIM	vimentin	Cytoplasm	other	diagnosis,efficacy,prognosis,unspecified application		7431	22352	81818
VWC2	von Willebrand factor C domain containing 2	Extracellular Space	other			375567	319922	501231
VWCE	von Willebrand factor C and EGF domains	Cytoplasm	other			220001	71768	309209
WDR54	WD repeat domain 54	Other	other			84058	75659	500226
WDR82	WD repeat domain 82	Nucleus	enzyme			80335	77305	686295
WNK3	WNK lysine deficient protein kinase 3	Plasma Membrane	kinase			65267	279561	317420
WNT5A	Wnt family member 5A	Extracellular Space	cytokine			7474	22418	64566
WTAP	WT1 associated protein	Nucleus	other			9589	60532	499020
YPEL2	yippee like 2	Nucleus	other			388403	77864
YTHDC1	YTH domain containing 1	Cytoplasm	other			91746	231386	170956
ZBTB2	zinc finger and BTB domain containing 2	Nucleus	transcription regulator			57621	381990	308126
ZBTB11	zinc finger and BTB domain containing 11	Nucleus	transcription regulator			27107	271377	304010
